# Supplementary material
Source: PubMed Central journal article supplement (PMC3782284)

## Supplementary Data

### **Silver Nanoparticle Toxicity in the Embryonic Zebrafish is Governed by Particle Dispersion and Ionic Environment**

Ki-Tae Kim<sup>†</sup>, Lisa Truong<sup>†</sup>, Leah Wehmas, Robert L. Tanguay\*

Department of Environmental and Molecular Toxicology, the Sinnhuber Aquatic Research  
Laboratory and the Environmental Health Sciences Center at Oregon State University, and Safer  
Nanomaterials and Nanomanufacturing Initiative, Oregon Nanoscience and Microtechnologies  
Institute, Corvallis, OR

<sup>†</sup> Kim and Truong contributed equally to this work and are listed in alphabetical order.

Number of pages: 5 (this page is not included)

Number of figures: 4

Number of table: 1

## **NCL report (NCL-NIEH201111A)**

The interest in engineered nanomaterials (ENMs) is growing at the National Institute of Environmental Health Sciences (NIEHS). To address the concerns of the ENMs safety, an interdisciplinary program, NIEHS Centers for Nanotechnology Health Implications Research (NCNHIR) Consortium was created. The NCNHIR Consortium consists of eight cooperative centers funded through Nanotechnology Environmental Health and Safety program for toxicity evaluation, the Nanotechnology Characterization Laboratory (NCL) for nanomaterial characterization and the National Institute of Biomedical Imaging and Bioengineering to create an informational database.

NCL characterized 20 and 110 nm AgNPs, with either PVP or citrate surface coatings, synthesized by nanoComposix (San Diego, CA). They stored materials 4 °C without freezing in a sterile environment. NCL confirmed the sterility threshold for endotoxin contamination, less than 2.5 EU/mL. They reported instability of citrate-stabilized AgNPs in high ionic strength buffers. Citrate-stabilized AgNPs precipitate immediately (within minutes) while PVP-stabilized AgNPs precipitate gradually (in hours) in saline and PBS buffers. They reported that size of PVP-stabilized AgNPs is increased as a function of time in saline and PBS buffers. Also, they reported instability of materials under gamma irradiation. The details for hydrodynamic diameter and zeta potential of four AgNPs are provided in the following pages.

**Table S1. LC<sub>50</sub> values (the concentration causing 50% mortality) and EC<sub>50</sub> values (the concentration causing 50% of adverse effects including mortality and any malformations) calculated using the Probit analysis over 6 exposure concentrations.**

| Silver Nanoparticle (AgNPs)    | Test Media        | LC <sub>50</sub> (mg/L) | EC <sub>50</sub> (mg/L)  |
|--------------------------------|-------------------|-------------------------|--------------------------|
| 20nm Citrate-stabilized AgNPs  | UP                | 36.78                   | 13.06                    |
|                                | CaCl <sub>2</sub> | 42.97                   | 45.85                    |
|                                | EM                | 44.78                   | outside of testing range |
| 110nm Citrate-stabilized AgNPs | UP                | 9.98                    | 18.00                    |
|                                | CaCl <sub>2</sub> | 10.20                   | 20.20                    |
|                                | EM                | N/A                     | outside of testing range |
| 20nm PVP-stabilized AgNPs      | UP                | 11.92                   | 10.10                    |
|                                | CaCl <sub>2</sub> | 4.14                    | 2.14                     |
|                                | EM                | 42.49                   | outside of testing range |
| 110nm PVP-stabilized AgNPs     | UP                | 0.08                    | 44.59                    |
|                                | CaCl <sub>2</sub> | 44.53                   | outside of testing range |
|                                | EM                | N/A                     | N/A                      |
| 10 kDa PVP UP                  |                   | N/A                     | N/A                      |
| 10 kDa PVP CaCl <sub>2</sub>   |                   | N/A                     | N/A                      |
| 10 kDa PVP EM                  |                   | N/A                     | N/A                      |
| 40 kDa PVP UP                  |                   | N/A                     | N/A                      |
| 40 kDa PVP CaCl <sub>2</sub>   |                   | N/A                     | N/A                      |
| 40 kDa PVP EM                  |                   | N/A                     | N/A                      |

EM: embryo media; CaCl<sub>2</sub>: 62.5 μM CaCl<sub>2</sub>; UP: ultrapure water

N/A: not calculated due to low toxicity

**Figure S1. NCL characterization results (Hydrodynamic diameter). Taken from the NCL report (NCL-NIEHS201111A).**

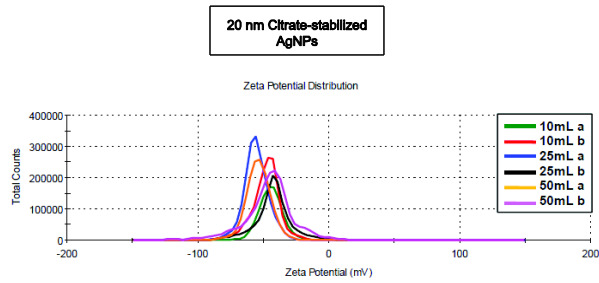

| NCL Particle Designation | Nanomaterial                     | Test Aliquot | Zeta Potential (mV) | pH          |     |
|--------------------------|----------------------------------|--------------|---------------------|-------------|-----|
| NIEHS-1                  | 20 nm, citrate stabilized silver | 10 mL        | a                   | -44.3 ± 1.3 | 6.6 |
|                          |                                  |              | b                   | -48.3 ± 1.6 | 6.5 |
|                          |                                  | 25 mL        | a                   | -55.5 ± 1.0 | 6.5 |
|                          |                                  |              | b                   | -43.1 ± 1.7 | 6.5 |
|                          |                                  | 50 mL        | a                   | -53.6 ± 2.1 | 6.6 |
|                          |                                  |              | b                   | -46.2 ± 1.0 | 6.6 |

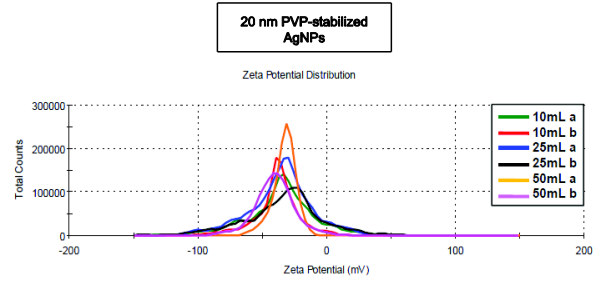

| NCL Particle Designation | Nanomaterial                 | Test Aliquot | Zeta Potential (mV) | pH          |     |
|--------------------------|------------------------------|--------------|---------------------|-------------|-----|
| NIEHS-2                  | 20 nm, PVP stabilized silver | 10 mL        | a                   | -38.2 ± 1.6 | 6.0 |
|                          |                              |              | b                   | -38.7 ± 0.8 | 6.0 |
|                          |                              | 25 mL        | a                   | -36.8 ± 1.3 | 6.2 |
|                          |                              |              | b                   | -35.9 ± 2.3 | 6.2 |
|                          |                              | 50 mL        | a                   | -32.5 ± 1.9 | 6.2 |
|                          |                              |              | b                   | -40.6 ± 1.6 | 6.2 |

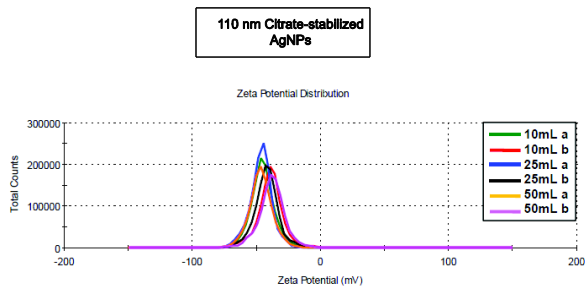

| NCL Particle Designation | Nanomaterial                      | Test Aliquot | Zeta Potential (mV) | pH          |     |
|--------------------------|-----------------------------------|--------------|---------------------|-------------|-----|
| NIEHS-3                  | 110 nm, citrate stabilized silver | 10 mL        | a                   | -45.2 ± 0.4 | 6.4 |
|                          |                                   |              | b                   | -39.7 ± 1.1 | 6.5 |
|                          |                                   | 25 mL        | a                   | -46.4 ± 1.0 | 6.6 |
|                          |                                   |              | b                   | -42.3 ± 0.8 | 6.6 |
|                          |                                   | 50 mL        | a                   | -46.5 ± 1.2 | 6.6 |
|                          |                                   |              | b                   | -38.0 ± 2.7 | 6.6 |

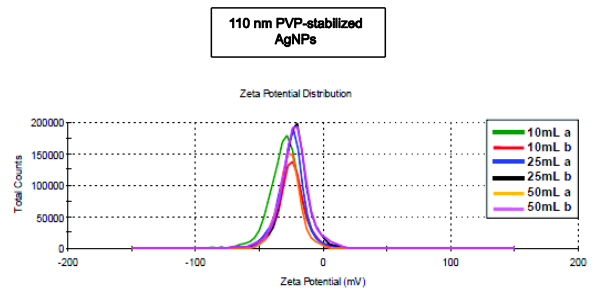

| NCL Particle Designation | Nanomaterial                  | Test Aliquot | Zeta Potential (mV) | pH          |     |
|--------------------------|-------------------------------|--------------|---------------------|-------------|-----|
| NIEHS-4                  | 110 nm, PVP stabilized silver | 10 mL        | a                   | -31.6 ± 2.2 | 5.6 |
|                          |                               |              | b                   | -25.0 ± 0.8 | 5.8 |
|                          |                               | 25 mL        | a                   | -25.5 ± 0.9 | 6.0 |
|                          |                               |              | b                   | -23.6 ± 0.9 | 6.0 |
|                          |                               | 50 mL        | a                   | -26.5 ± 0.8 | 6.0 |
|                          |                               |              | b                   | -23.3 ± 1.5 | 6.0 |

**Figure S2. NCL characterization results (zeta-potential). Taken from the NCL report (NCL-NIEHS201111A).**

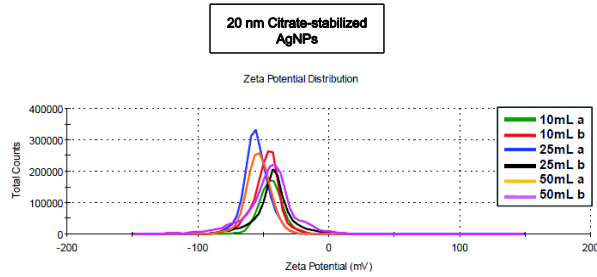

| NCL Particle Designation | Nanomaterial                     | Test Aliquot | Zeta Potential (mV) | pH          |     |
|--------------------------|----------------------------------|--------------|---------------------|-------------|-----|
| NIEHS-1                  | 20 nm, citrate stabilized silver | 10 mL        | a                   | -44.3 ± 1.3 | 6.6 |
|                          |                                  |              | b                   | -48.3 ± 1.6 | 6.5 |
|                          |                                  | 25 mL        | a                   | -55.5 ± 1.0 | 6.5 |
|                          |                                  |              | b                   | -43.1 ± 1.7 | 6.5 |
|                          |                                  | 50 mL        | a                   | -53.6 ± 2.1 | 6.6 |
|                          |                                  |              | b                   | -46.2 ± 1.0 | 6.6 |

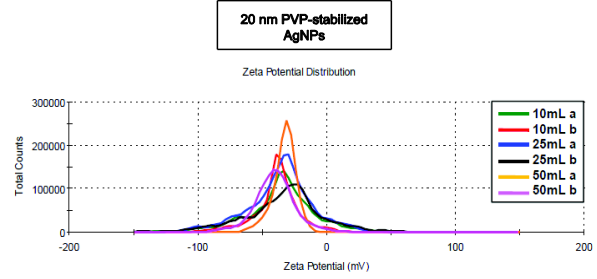

| NCL Particle Designation | Nanomaterial                 | Test Aliquot | Zeta Potential (mV) | pH          |     |
|--------------------------|------------------------------|--------------|---------------------|-------------|-----|
| NIEHS-2                  | 20 nm, PVP stabilized silver | 10 mL        | a                   | -38.2 ± 1.6 | 6.0 |
|                          |                              |              | b                   | -38.7 ± 0.8 | 6.0 |
|                          |                              | 25 mL        | a                   | -36.8 ± 1.3 | 6.2 |
|                          |                              |              | b                   | -35.9 ± 2.3 | 6.2 |
|                          |                              | 50 mL        | a                   | -32.5 ± 1.9 | 6.2 |
|                          |                              |              | b                   | -40.6 ± 1.6 | 6.2 |

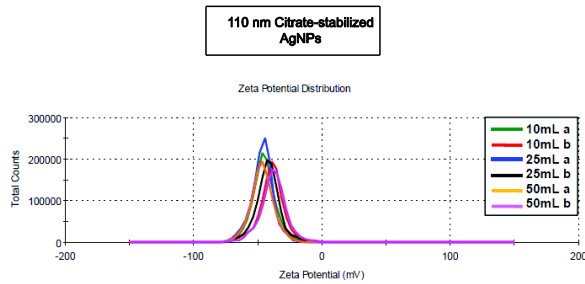

| NCL Particle Designation | Nanomaterial                      | Test Aliquot | Zeta Potential (mV) | pH          |     |
|--------------------------|-----------------------------------|--------------|---------------------|-------------|-----|
| NIEHS-3                  | 110 nm, citrate stabilized silver | 10 mL        | a                   | -45.2 ± 0.4 | 6.4 |
|                          |                                   |              | b                   | -39.7 ± 1.1 | 6.5 |
|                          |                                   | 25 mL        | a                   | -46.4 ± 1.0 | 6.6 |
|                          |                                   |              | b                   | -42.3 ± 0.8 | 6.6 |
|                          |                                   | 50 mL        | a                   | -46.5 ± 1.2 | 6.6 |
|                          |                                   |              | b                   | -38.0 ± 2.7 | 6.6 |

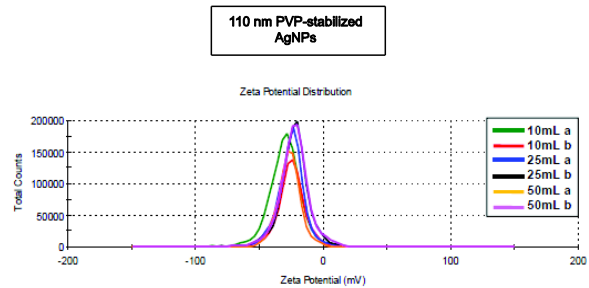

| NCL Particle Designation | Nanomaterial                  | Test Aliquot | Zeta Potential (mV) | pH          |     |
|--------------------------|-------------------------------|--------------|---------------------|-------------|-----|
| NIEHS-4                  | 110 nm, PVP stabilized silver | 10 mL        | a                   | -31.6 ± 2.2 | 5.6 |
|                          |                               |              | b                   | -25.0 ± 0.8 | 5.8 |
|                          |                               | 25 mL        | a                   | -25.5 ± 0.9 | 6.0 |
|                          |                               |              | b                   | -23.6 ± 0.9 | 6.0 |
|                          |                               | 50 mL        | a                   | -26.5 ± 0.8 | 6.0 |
|                          |                               |              | b                   | -23.3 ± 1.5 | 6.0 |

**Figure S3. Silver concentration of the supernatant of 4 AgNPs suspended in embryo media, 62.5  $\mu\text{M}$   $\text{CaCl}_2$  and ultrapure water. The initial concentration was 5  $\mu\text{g/L}$ .**

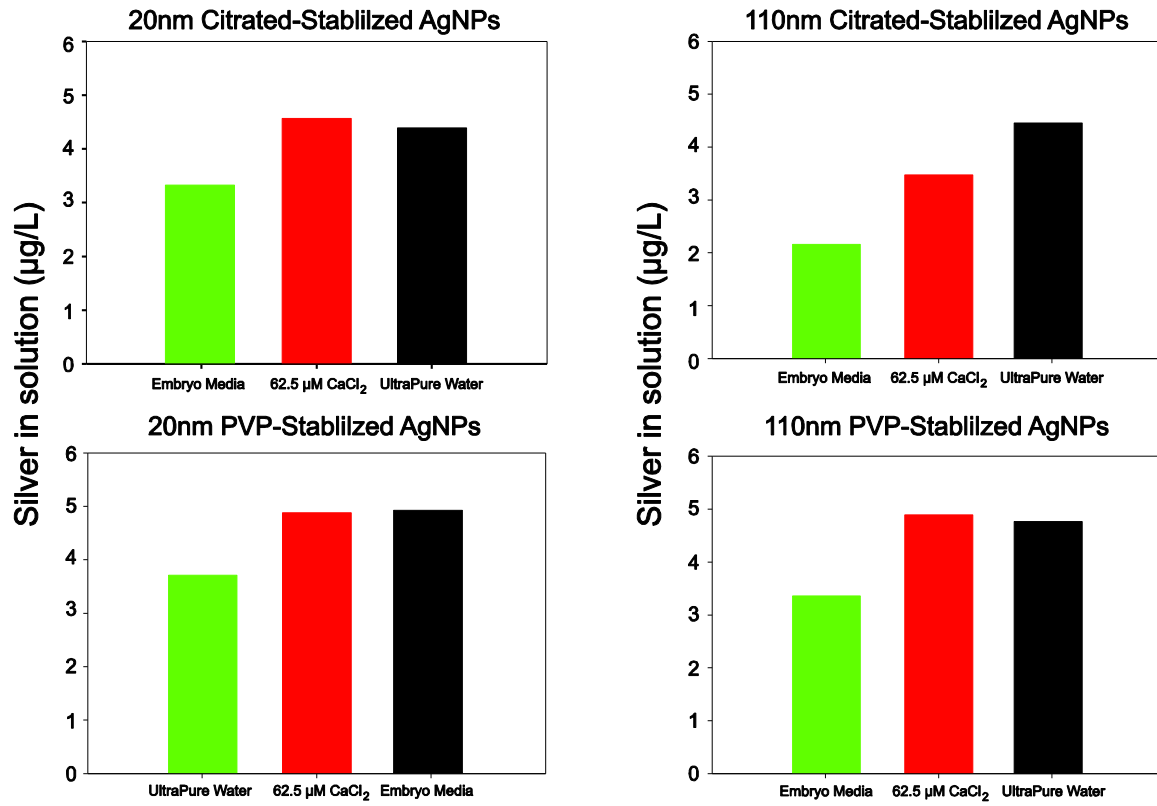

**Figure S4. Relationship between silver body burden and toxicity in embryo media, 62.5  $\mu\text{M}$   $\text{CaCl}_2$  and ultrapure water at 10 and 50 mg/L.**

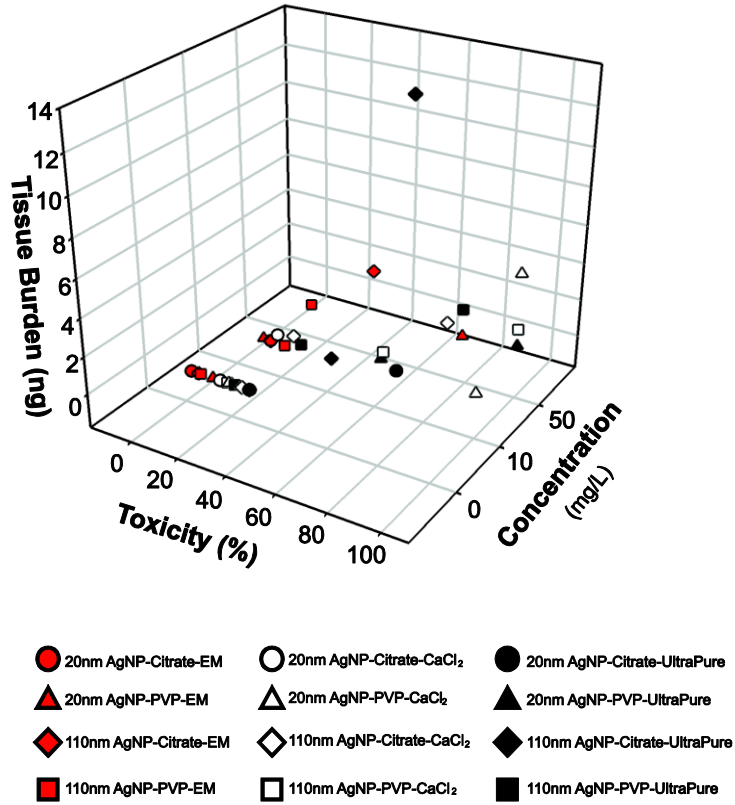

Supplement: NIHMS453111-supplement-nano115101suppdata_pdf.pdf [file NIHMS453111-supplement-nano115101suppdata_pdf.pdf]
